# Supplementary figures and images for: Fabrication of Fe–Fe1−xO based 3D coplanar microsupercapacitors by electric discharge rusting of pure iron substrates
Source: Royal Society of Chemistry journal article supplement (doi:10.1039/d3ra04838a), 2023-01-01

## Supporting Information

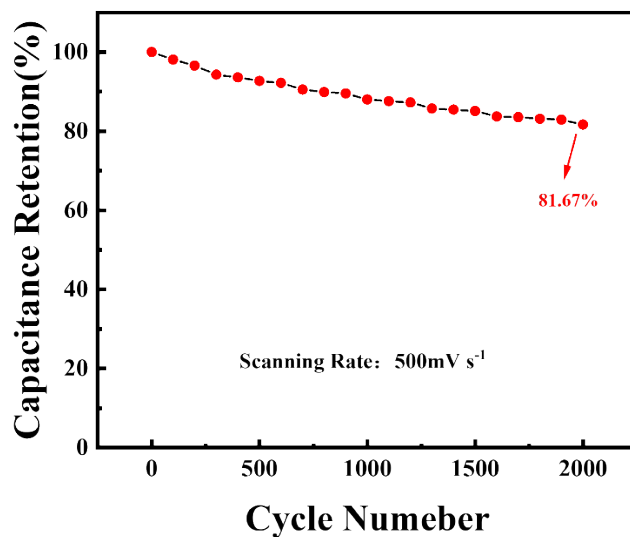

Fig.1S Cyclic stability testing of 2F-CMSC fabricated by EDR technique

Supplement: d3ra04838a1.pdf [file d3ra04838a1.pdf]
